# Supplementary material
Source: ML conference proceedings conference paper supplement (https://proceedings.neurips.cc/paper_files/paper/2023/hash/516ca2e9e7bffbb4027a25d9f8838bc9-Abstract.html)
Supplement: Supplementary file 1 [file 516ca2e9e7bffbb4027a25d9f8838bc9-Supplemental-Conference.pdf]

---

# Provably Robust Temporal Difference Learning for Heavy-Tailed Rewards

---

Anonymous Author(s)

Affiliation

Address

email

## Abstract

1 In a broad class of reinforcement learning applications, stochastic rewards have  
2 heavy-tailed distributions, which lead to infinite second-order moments for stochastic  
3 (semi)gradients in policy evaluation and direct policy optimization. In such  
4 instances, the existing RL methods may fail miserably due to frequent statistical  
5 outliers. In this work, we establish that temporal difference (TD) learning with  
6 a dynamic gradient clipping mechanism, and correspondingly operated natural  
7 actor-critic (NAC), can be provably robustified against heavy-tailed reward dis-  
8 tributions. It is shown in the framework of linear function approximation that a  
9 favorable tradeoff between bias and variability of the stochastic gradients can be  
10 achieved with this dynamic gradient clipping mechanism. In particular, we prove  
11 that robust versions of TD learning achieve sample complexities of order  $\mathcal{O}(\varepsilon^{-\frac{1}{p}})$   
12 and  $\mathcal{O}(\varepsilon^{-1-\frac{1}{p}})$  with and without the full-rank assumption on the feature matrix,  
13 respectively, under heavy-tailed rewards with finite moments of order  $(1+p)$  for  
14 some  $p \in (0, 1]$ , both in expectation and with high probability. We show that a  
15 robust variant of NAC based on Robust TD learning achieves  $\tilde{\mathcal{O}}(\varepsilon^{-4-\frac{2}{p}})$  sample  
16 complexity. We corroborate our theoretical results with numerical experiments.

## 17 1 Introduction

18 In this paper, we develop a framework for robust reinforcement learning in the presence of rewards  
19 with heavy-tailed distributions. Heavy-tailed phenomena, stemming from frequently observed  
20 statistical outliers, have been ubiquitous in decision-making applications under uncertainty. To name  
21 a few examples, waiting times in wireless communication networks [43, 23, 56], completion times of  
22 SAT solvers [13], numerous payoff quantities (e.g., stock prices, consumer signals) in economics and  
23 finance [21, 34, 37, 36] exhibit heavy-tailed behavior. An important characteristic of heavy-tailed  
24 random variables is the infinite order of higher moments, which stems from the frequently occurring  
25 outliers.

26 In reinforcement learning (RL), the goal is to maximize expected total reward in a Markov decision  
27 process (MDP) by continual interactions with the unknown and dynamic environment. Among policy  
28 optimization methods, Natural actor-critic (NAC) method and its variants [49, 29, 45, 16, 26, 5, 28]  
29 have become particularly prevalent due to their desirable stability and versatility characteristics,  
30 emanating from the use of temporal difference (TD) learning as the critic for the policy evaluation  
31 component of the NAC operation. The existing theoretical analyses for temporal difference learning  
32 [4, 52] and natural policy gradient/actor-critic methods [60, 1, 55] assume that the stochastic gradients  
33 have finite second-order moments, or even they are bounded. In particular, it is unknown whether  
34 natural actor-critic with function approximation is robust for stochastic rewards of heavy-tailed  
35 distributions with potentially infinite second-order moments. Furthermore, in practice, these methods

36 are prone to non-vanishing and even increasing error under heavy-tailed reward distributions (see  
 37 Example 1). This motivates us for the following fundamental question in this paper:

38 *Can temporal difference learning with function approximation be modified to provably achieve*  
 39 *global optimality under stochastic rewards with heavy tails?*

40 We provide an affirmative answer to the above question by proposing a simple modification to the  
 41 TD learning algorithm, which yields robustness against heavy tails. In particular, we show that  
 42 incorporating a dynamic gradient clipping mechanism with a carefully-chosen sequence of clipping  
 43 radii can provably robustify TD learning and NAC with linear function approximation, leading to  
 44 global near-optimality even under stochastic rewards of infinite variance.

45 **Example 1** (Failure of TD learning under heavy-tailed reward). In this example, we consider a  
 46 randomly-generated discounted-reward Markov reward process<sup>1</sup>  $(X_t, R_t)_t$  on a state space  $\mathbb{X}$  with  
 47  $|\mathbb{X}| = 64$  states, with the discount factor  $\gamma = 0.9$  and the reward  $R_t(X_t) = r(X_t) + N_t - \mathbb{E}[N_t]$  with  
 48  $N_t \stackrel{iid}{\sim} \text{Pareto}(1, 1.4)$  for any  $t$ . In order to predict the value function, we use (projected) TD learning  
 49 (see [4]) with linear function approximation based on Gaussian features of dimension  $d = 4$  and  
 projection radius  $\rho = 30$ . The performance results are shown in Figure 1. Since  $R_t$  is heavy-tailed

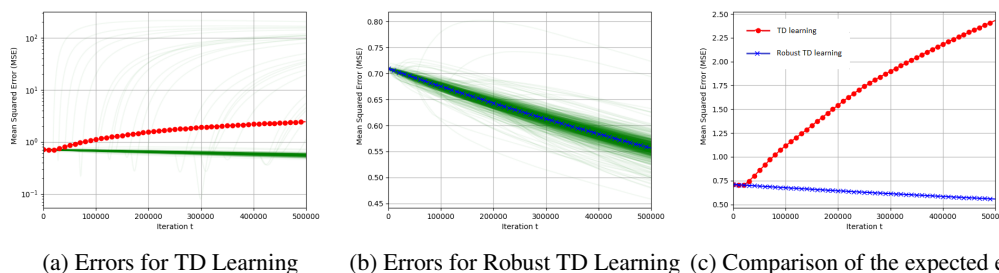

(a) Errors for TD Learning      (b) Errors for Robust TD Learning      (c) Comparison of the expected errors  
 Figure 1: Non-convergent behavior of TD learning under heavy-tailed noise with tail index 1.4. Each faded green line is the MSE for an individual trial, and the solid lines with markers indicate the average mean squared error for **TD learning** and **Robust TD learning**.

50  
 51 with infinite variance, the existing convergence results for traditional TD learning, which assume  
 52 that  $R_t$  has finite variance, do not hold. Furthermore, Figure 1 reveals that TD learning is prone to  
 53 non-vanishing and even increasing error in practice despite the projection step, iterate averaging and  
 54 small learning rate, due to the statistical outliers that cause extremely large error often as indicated by  
 55 a non-negligible fraction of green lines in Figure 1a. On the other hand, with the same learning rate,  
 56 projection radius and state-reward realizations, our robust variant of TD learning provides resilience  
 57 against outliers (see Figure 1b), and leads to convergence in the expected behavior as in Figure 1c.

58 Stochastic rewards with heavy-tailed distributions appear in many important applications. Below, we  
 59 briefly provide two motivating applications that necessitate robust RL methods to handle heavy tails.

60 **Application (1): Algorithm portfolios.** In solving complicated problems such as Boolean  
 61 satisfiability (SAT) and complete search problems, which appear in numerous applications [18, 42],  
 62 multiple algorithmic solutions with different characteristics are available. The algorithm selection  
 63 problem is concerned about the minimization of total execution times to solve these problems  
 64 [31, 47, 30], where different data distributions and machine characteristics, caused by recursive  
 65 algorithms, are modeled as states, algorithm choices are modeled as actions, and the execution time  
 66 of a selected algorithm is modeled as the cost (i.e., negative reward). It is well-known that the  
 67 execution times, i.e., rewards, in the algorithm selection problem have *heavy-tailed distributions* with  
 68 infinite-variance (e.g.,  $\text{Pareto}(1, 1 + p)$  with  $0 < p < 1$  as in [12]) similar to the case in Example 1  
 69 [12, 14, 47]. Thus, algorithm selection problem requires robust techniques that we consider here.

70 **Application (2): Scheduling for wireless networks.** The scheduling problem considers matching  
 71 the users with random service demands to fading wireless channels (e.g., Gilbert-Elliot model) with  
 72 stochastic transmission times so as to minimize the expected delay. A widely-adopted approach to

<sup>1</sup>The details of the setup, along with other numerical examples can be found in Section 4.

73 study the scheduling problem is to use MDPs (see, e.g., [39, 20, 9, 2]). It has been observed that  
 74 the transmission times follow heavy-tailed distributions of infinite variance, due to various factors  
 75 including the MAC protocol used, packet size, and channel fading [17, 56, 23, 22]. As such, solving  
 76 this by using RL approach necessitates robust methods to handle heavy-tailed execution times.

77 **Main contributions.** Our main contributions in this paper contain the following.

78 • *Robust TD learning with dynamic clipping for heavy-tailed rewards.* We propose Robust TD  
 79 learning with a dynamic gradient clipping mechanism, and prove that this TD learning variant with  
 80 linear function approximation can achieve arbitrarily small estimation error that vanishes at rates  
 81  $\mathcal{O}(T^{-\frac{p}{1+p}})$  and  $\tilde{\mathcal{O}}(T^{-p})$  without and with full-rank assumption on the feature matrix, respectively,  
 82 even for heavy-tailed rewards with moments of order  $1 + p$  for  $p \in (0, 1]$ . Our proof techniques  
 83 make use of Lyapunov analysis coupled with martingale techniques for robust statistical estimation  
 84 in dynamical systems, and can be of independent interest in the analysis of first-order methods.

85 • *Robust NAC under heavy-tailed rewards.* Based on Robust TD learning and the compatible  
 86 function approximation result in [26], we propose a robust NAC variant, and show that  $\mathcal{O}(\varepsilon^{-4-\frac{2}{p}})$   
 87 samples suffice to achieve  $\varepsilon > 0$  error under standard concentrability coefficient assumptions.

88 • *High-probability error bounds.* We provide high-probability (sub-Gaussian) error bounds for the  
 89 robust NAC and TD learning methods in addition to the traditional expectation bounds.

90 From a statistical viewpoint, our analysis in this work indicates a favorable bias-variance tradeoff: by  
 91 introducing a vanishing bias to the semi-gradient via particular choices of dynamic gradient clipping,  
 92 one can achieve *robustness* by eliminating the destructive impacts of statistical outliers even if the  
 93 semi-gradient has infinite variance, leading to near optimality.

## 94 1.1 Related Work

95 **Temporal difference learning.** Temporal difference (TD) learning was proposed in [48], and has  
 96 been the prominent policy evaluation method. The existing theoretical analyses of TD learning  
 97 consider MDPs with bounded rewards [4, 7], or rewards with finite variance [52], while we consider  
 98 heavy-tailed rewards. Furthermore, all of these works provide guarantees for the expected error,  
 99 rather than high-probability bounds on the error. Our analysis utilizes the Lyapunov techniques in [4].

100 **Policy gradient methods.** Policy gradient (PG), and its variant natural policy gradient (NPG) have  
 101 attracted significant attention in RL [57, 50, 26]. Recent theoretical works investigate the local and  
 102 global convergence of these methods in the exact case, or with stochastic and bounded rewards  
 103 [1, 55, 33, 38, 59]. As such, heavy-tailed rewards have not been considered in these works.

104 **Bandits with heavy-tailed rewards.** Stochastic bandit variants with heavy-tailed payoffs were  
 105 studied in multiple works [6, 46, 32, 8]. The stochastic bandit setting can be interpreted as a very  
 106 simple single-state (i.e., stateless or memoryless) model-based and tabular RL problem. The model  
 107 we consider in this paper is a model-free RL setting on an MDP with a large state space, which is  
 108 considerably more complicated than the bandit setting.

109 **Stochastic gradient descent with heavy-tailed noise.** There has been an increasing interest in the  
 110 analysis of SGD with heavy-tailed gradient noise recently [54, 10, 15], following the seminal work  
 111 of [44]. In our work, we consider the RL problem, which has significantly different dynamics than  
 112 stochastic convex optimization.

113 **Robust mean and covariance estimation.** In basic statistical problems of mean and covariance  
 114 estimation [41, 40, 35] and regression [19], the traditional methods do not yield the optimal conver-  
 115 gence rates for heavy-tailed random variables, which led to the development of robust mean and  
 116 covariance estimation techniques (for reference, see [35, 27]). Our paper utilizes tools from robust  
 117 mean estimation literature (particularly, truncated mean estimator analysis in [6]), but considers the  
 118 more complicated problem of TD learning and policy optimization in a dynamic environment rather  
 119 than a static mean or covariance estimation problem with iid observations.

## 120 1.2 Notation

121 For a symmetric matrix  $A \in \mathbb{R}^{d \times d}$ ,  $\lambda_{\min}(A)$  denotes its minimum eigenvalue.  $B_2(x, \rho) = \{y \in \mathbb{R}^d :$   
 122  $\|x - y\|_2 \leq \rho\}$  and  $\Pi_{\mathcal{C}}\{x\} = \arg \min_{y \in \mathcal{C}} \|x - y\|_2^2$  for any convex  $\mathcal{C} \subset \mathbb{R}^d$ .

## 123 2 Robust TD Learning for Value Prediction under Heavy Tails

124 First, we consider the problem of predicting the value function for a given discounted-reward Markov  
125 reward process with heavy-tailed rewards.

### 126 2.1 Value Prediction Problem

127 For a finite but arbitrarily large state space  $\mathbb{X}$ , let  $(X_t)_{t \in \mathbb{N}}$  be an  $\mathbb{X}$ -valued Markov chain with the  
128 transition kernel  $\mathcal{P} : \mathbb{X} \times \mathbb{X} \rightarrow [0, 1]$ . We consider a Markov reward process  $(X_t, R_t)_{t \in \mathbb{N}}$  such that at  
129 state  $X_t$ , a stochastic reward  $R_t = R_t(X_t)$  is obtained for all  $t \geq 0$ . For a discount factor  $\gamma \in [0, 1)$ ,  
130 the value function for the MRP  $(X_t, R_t)_{t \in \mathbb{N}}$  is the following:

$$\mathcal{V}(x) = \mathbb{E} \left[ \sum_{t=1}^{\infty} \gamma^{t-1} R_t(X_t) \middle| X_1 = x \right], \quad x \in \mathbb{X}. \quad (1)$$

131 **Objective.** The goal is to learn  $\mathcal{V}$  without knowing the transition kernel  $\mathcal{P}$  by using samples from the  
132 system. In particular, for a parameterized class of functions  $\{f_{\Theta} : \mathbb{X} \rightarrow \mathbb{R} : \Theta \in \mathbb{R}^d\}$ , the goal is to  
133 solve the following stochastic optimization problem with mean squared error:

$$\min_{\Theta \in \mathbb{R}^d} \mathbb{E}_{x \sim \mu} |f_{\Theta}(x) - \mathcal{V}(x)|^2. \quad (2)$$

134 In order to solve (2) under Assumption 1, next we propose a robust variant of temporal difference  
135 (TD) learning with linear function approximation [48, 52].

### 136 2.2 Robust TD Learning Algorithm

For a given set of feature vectors  $\{\Phi(x) \in \mathbb{R}^d : x \in \mathbb{X}\}$  with  $\sup_{x \in \mathbb{X}} \|\Phi(x)\|_2 \leq 1$ , we use  
 $f_{\Theta}(\cdot) = \langle \Theta, \Phi(\cdot) \rangle$  as the approximation architecture. For a given dataset  $\mathcal{D} = \{(X_t, R_t, X'_t) \in$   
 $\mathbb{X} \times \mathbb{R} \times \mathbb{X} : t \in \mathbb{N}\}$  with  $X'_t \sim \mathcal{P}(X_t, \cdot)$ , let the stochastic semi-gradient at  $\Theta \in \mathbb{R}^d$  be defined as

$$g_t(\Theta) = \left( R_t(X_t) + \gamma f_{\Theta}(X'_t) - f_{\Theta}(X_t) \right) \nabla_{\Theta} f_{\Theta}(X_t).$$

Robust TD learning is summarized in Algorithm 1.

---

#### Algorithm 1: Robust TD learning

---

**Inputs:** number of steps  $T \geq 1$ , clipping radii  $(b_t)_{t \in [T]}$ , projection radius  $\rho > 0$ , step-size  $\eta > 0$   
Set  $\Theta(1) \in B_2(0, \rho)$  \\ initialization  
**for**  $t = 1, 2, \dots, T$  **do**  
     $\Theta_k(t+1) = \Pi_{B_2(0, \rho)} \left\{ \Theta_k(t) + \eta_t \cdot g_t^{(k)}(\Theta_k(t)) \cdot \mathbb{1} \{ \|g_t^{(k)}(\Theta_k(t))\|_2 \leq b_t \} \right\}$   
**end for**  
**Output:**  $f_{\bar{\Theta}(T)}(\cdot) = \langle \bar{\Theta}(T), \Phi(\cdot) \rangle$  where  $\bar{\Theta}(T) = \frac{1}{T} \sum_{t=1}^T \Theta(t)$

---

137

138 In the following, we will establish finite-time bounds for Robust TD learning by specifying the  
139 sequence of dynamic gradient clipping radii  $(b_t)_{t \geq 1}$ , projection radius  $\rho$  and step-size  $\eta$ .

### 140 2.3 Finite-Time Bounds for Robust TD Learning

141 We make the following assumptions on the Markov reward process.

142 **Assumption 1.** The stochastic process  $(X_t, R_t)_{t \in \mathbb{N}}$  satisfies the following:

143 1. Ergodicity:  $(X_t)_{t \in \mathbb{N}}$  is an irreducible and aperiodic Markov chain with stationary distribution  
144  $\mu = \mu \mathcal{P}$ . Also, we assume that there are constants  $m > 0, \zeta \in (0, 1)$  such that

$$\max_{x \in \mathbb{X}} \|\mathcal{P}^t(x, \cdot) - \mu\|_{\text{TV}} \leq m \zeta^t, \quad \forall t \in \mathbb{Z}_+. \quad (3)$$

145 2. Heavy-tailed reward: For some  $p \in (0, 1]$  and constant  $u_0 \in (0, \infty)$ ,

$$\mathbb{E}[|R_t(X_t)|^{1+p} | X_t] \leq u_0 < \infty, \quad a.s., \quad \forall t \in \mathbb{N}. \quad (4)$$

146 3. Mean reward: For any  $t \in \mathbb{N}$ ,  $\mathbb{E}[R_t(X_t) | X_t] = r(X_t) \in [-1, 1]$  a.s.

147 We note that the uniform ergodicity and bounded mean reward assumptions are standard in TD  
148 learning literature [3, 52, 4].

149 **Assumption 2** (Sampling). We consider two types of sampling strategies in this work:

150 2a. *IID sampling*:  $X_t \stackrel{iid}{\sim} \mu$  and  $X'_t \sim \mathcal{P}(X_t, \cdot)$  for all  $t \geq 1$ .

151 2b. *Markovian sampling*:  $X_1 \sim \mu$  and  $X'_t = X_{t+1} \sim \mathcal{P}(X_t, \cdot)$  for all  $t \geq 1$ .

152 **Assumption 3** (Realizability). There exists  $\Theta^* \in B_2(0, \rho)$  such that  $\mathcal{V}(\cdot) = \langle \Theta^*, \Phi(\cdot) \rangle$ .

153 We note that Assumption 3 holds directly in interesting realizable problem classes, e.g., linear MDPs  
154 [24], and allows us to obtain results on the vanishing error performance of our design. In cases when  
155 it does not hold, our results will continue to hold with an additional non-vanishing approximation  
156 error that is unavoidable due to limitation of the linear function approximation architecture.

157 The following lemma is important in bounding the moments of the gradient norm under Robust TD  
158 learning in terms of the projection radius  $\rho > 0$  and the upper bound  $u_0$  on  $\mathbb{E}[|R_t(X_t)|^{1+p}|X_t]$ .

159 **Lemma 1** (Tail bounds for  $\|g_t(\Theta(t))\|_2$ ). Let  $\mathcal{F}_t^+ = \sigma(\Theta(1), \Theta(2), \dots, \Theta(t), X_t)$  for  $t \in \mathbb{Z}_+$ .  
160 Then, under Assumption 1, we have:

$$\mathbb{E}[\|g_t(\Theta(t))\|_2^{1+p} | \mathcal{F}_t^+] \leq u < \infty, \text{ a.s.}, \quad (5)$$

161 for any  $t \in \mathbb{Z}_+$ , where  $u = \min\{(u_0^{\frac{1}{1+p}} + 2\rho)^{1+p}, u_0 + 2^{2p+3}\rho^{1+p}\}$ .

162 *Proof.* Note that we have  $\mathbb{E}[\|g_t(\Theta(t))\|_2^{1+p} | \mathcal{F}_t^+] \leq \mathbb{E}[|R_t(X_t) + \gamma f_{\Theta(t)}(X'_t) - f_{\Theta(t)}(X_t)|^{1+p} | \mathcal{F}_t^+]$   
163 since  $\sup_{x \in \mathbb{X}} \|\Phi(x)\|_2 \leq 1$ . The upper bounds then follow by applying Minkowski's inequality and  
164 the triangle inequality for  $L^p$  spaces, respectively, to this inequality.  $\square$

165 This lemma will be useful in the analysis of both the expected (Theorems 1-2), and the high-probability  
166 bounds (Theorem 3) on the performance of Robust TD learning.

167 Next, we provide the main theoretical results in this paper: finite-time bounds for Robust TD learning.  
168 The proofs are mainly deferred to the appendix, while we provide a proof sketch for Theorem 3. In  
169 the following, we provide convergence bounds for the expected mean squared error under Robust TD  
170 learning with various choices of  $b_t$ .

171 **Theorem 1** (Expected error under Robust TD learning – iid sampling). Under Assumptions 1, 2a, 3,  
172 we have the following bounds for Robust TD learning:

173 **a)** For  $b_t = (ut)^{\frac{1}{1+p}}$  for any  $t \in \mathbb{Z}_+$  and  $\eta_t = \eta = \frac{2\rho(1-\gamma)}{(uT)^{\frac{1}{1+p}}}$ , we have:

$$\mathbb{E}_{\Theta(1), \Theta(2), \dots, \Theta(T)} \left[ \left( \mathcal{V}(x) - \langle \bar{\Theta}(T), \Phi(x) \rangle \right)^2 \right] \leq \frac{6\rho u^{\frac{1}{1+p}}}{(1-\gamma)T^{\frac{p}{1+p}}}, \quad \forall T > 1. \quad (6)$$

174 **b)** Let  $\Lambda = \sum_{x \in \mathbb{X}} \mu(x) \Phi(x) \Phi^\top(x)$ , and  $\mathfrak{C}_p(u, \lambda_{\min}, \gamma, \rho) = \frac{u}{1-\gamma} \left( 4\rho + \frac{1}{(1-\gamma)\lambda_{\min}} \right)$ . If  $\lambda_{\min}(\Lambda) =$   
175  $\lambda_{\min} > 0$ , then with the diminishing step-size  $\eta_t = \frac{1}{(1-\gamma)t\lambda_{\min}}$  and  $b_t = t$  for  $t \in \mathbb{Z}_+$ , for the average  
176 iterate  $\bar{\Theta}(T)$ , we have<sup>2</sup>:

$$\mathbb{E}_{\Theta(1), \Theta(2), \dots, \Theta(T)} \left( \mathcal{V}(x) - \langle \bar{\Theta}(T), \Phi(x) \rangle \right)^2 \leq \mathfrak{C}_p(u, \lambda_{\min}, \gamma, \rho) \left[ \frac{\mathbf{1}_{p,1} T^{-p}}{1-p} + \frac{(1 - \mathbf{1}_{p,1}) \log(eT)}{T} \right], \quad (7)$$

177 and for the last iterate  $\Theta(T+1)$ , we have:

$$\mathbb{E}_{\Theta(1), \dots, \Theta(T)} \max_{x \in \mathbb{X}} |\mathcal{V}(x) - \langle \Phi(x), \Theta(T+1) \rangle|^2 \leq \frac{\mathfrak{C}_p(u, \lambda_{\min}, \gamma, \rho)}{\lambda_{\min}} \left[ \frac{\log(eT)(1 - \mathbf{1}_{p,1})}{T} + \frac{\mathbf{1}_{p,1} T^{-p}}{1-p} \right], \quad (8)$$

178 for any  $T > 1$ , where  $\mathbf{1}_{x,y} = 1$  if  $x \neq y$  and 0 otherwise.

<sup>2</sup>The upper bound is  $\mathfrak{C}_p(u, \lambda_{\min}, \gamma, \rho) \frac{1}{T} \sum_{t=1}^T t^{-p} = \tilde{O}(T^{-p})$ , which is further upper bounded as (6) and (7) by using integral bounds.

179 **Remark 1.** The convergence rates in Theorem 1 are  $\mathcal{O}(T^{-\frac{p}{1+p}})$  and  $\tilde{\mathcal{O}}(T^{-p})$  without and with the  
 180 full-rank assumption  $\lambda_{\min} > 0$ , respectively. For  $p = 1$ , the convergence rates stated in Theorem 1  
 181 both match the existing results for TD learning with bounded rewards [4], up to a larger scaling factor  
 182 of raw second-order moment rather than variance, due to clipping centered around 0.

183 In the following, we provide convergence bounds for Robust TD learning under Markovian sampling.

184 **Theorem 2** (Expected error under Robust TD learning – Markovian sampling). Under Assumptions  
 185 1,2b and 3, let  $T > 1$ ,  $\rho > 0$  be given, and define the mixing time  $\tau = \min\{t \in \mathbb{Z}_+ : m\zeta^t \leq$   
 186  $\sqrt{2}\rho(uT)^{-\frac{1}{1+p}}\}$ . Then, with  $\eta_t = \eta = \sqrt{2}\rho(uT)^{-\frac{1}{1+p}}$ , Robust TD learning yields the following:

$$\mathbb{E}_{\Theta(1), \Theta(2), \dots, \Theta(T)} \left( \mathcal{V}(x) - \langle \bar{\Theta}(T), \Phi(x) \rangle \right)^2 \leq \frac{7\rho u^{\frac{1}{1+p}}}{(1-\gamma)T^{\frac{p}{1+p}}} + \frac{2\sqrt{2}\rho(1+2\rho)(4\rho + \tau(1+6\rho))}{(1-\gamma)T^{\frac{1}{1+p}}}. \quad (9)$$

187

188 The proof of Theorem 2 is based on a similar Lyapunov technique as Theorem 1 in conjunction with  
 189 the mixing time analysis in [4] for Markovian sampling, and can be found in Appendix A.

190 The bounds in Theorem 1 involve expectation over the parameters  $\Theta(t)$ ,  $t \in [T]$ . In the following,  
 191 we provide a high-probability error bound on the mean squared error under Robust TD learning.

192 **Theorem 3** (High-probability bound for Robust TD learning). For any  $\delta \in (0, 1)$ , let  $L_\delta = \log(4/\delta)$ .

193 Under Assumptions 1, 2a, 3, with step-size  $\eta = \frac{\sqrt{2}(1-\gamma)\rho L_\delta^{\frac{1-p}{2(1+p)}}}{(uT)^{\frac{1}{1+p}}}$  and clipping radius  $b_t = \left(\frac{ut}{L_\delta}\right)^{\frac{1}{1+p}}$ ,

$$\sum_{x \in \mathbb{X}} \mu(x) \left( \mathcal{V}(x) - \langle \bar{\Theta}(T), \Phi(x) \rangle \right)^2 \leq \frac{\rho u^{\frac{1}{1+p}}}{(1-\gamma)T^{\frac{p}{1+p}}} \left( 3L_\delta^{-\frac{1-p}{2(1+p)}} + 7L_\delta^{\frac{p}{1+p}} \right), \quad (10)$$

194 holds with probability at least  $1 - \delta$ .

195 In the following, we give a proof sketch for Theorem 3. The full proof can be found in Appendix A.

196 *Proof sketch.* Let  $\mathcal{L}(\Theta) = \|\Theta - \Theta^*\|_2^2$  be the Lyapunov function, and  $\chi_t = 1 - \bar{\chi}_t = \mathbb{1}\{\|g_t\|_2 \leq b_t\}$ .  
 197 Then, the Lyapunov drift can be decomposed as follows:

$$\mathcal{L}(\Theta(t+1)) - \mathcal{L}(\Theta(t)) \leq 2\eta \mathbb{E}_t[g_t^\top (\Theta(t) - \Theta^*)] + \eta^2 \mathbb{E}_t[\|g_t\|_2^2 \chi_t] + 2\eta B(t) + \eta^2 Z(t), \quad (11)$$

198 where  $B(t) = g_t^\top (\Theta(t) - \Theta^*) \chi_t - \mathbb{E}_t[g_t^\top (\Theta(t) - \Theta^*) \chi_t] - \mathbb{E}_t[g_t^\top (\Theta(t) - \Theta^*) \bar{\chi}_t]$  is the bias in  
 199 the stochastic semi-gradient, and  $Z(t) = \|g_t\|_2^2 \chi_t - \mathbb{E}_t[\|g_t\|_2^2 \chi_t]$ . We can decompose  $B(t)$  further  
 200 into a martingale difference sequence  $B_0(t) = g_t^\top (\Theta(t) - \Theta^*) \chi_t - \mathbb{E}_t[g_t^\top (\Theta(t) - \Theta^*) \chi_t]$  and a  
 201 bias term  $B_\perp(t) = -\mathbb{E}_t[g_t^\top (\Theta(t) - \Theta^*) \bar{\chi}_t]$ . By Freedman's inequality for martingales [11, 51], we

202 have  $\frac{1}{T} \sum_{t=1}^T B_0(t) \leq \frac{7\rho u^{\frac{1}{1+p}} L_\delta^{\frac{p}{1+p}}}{T^{\frac{p}{1+p}}}$ , and by Azuma inequality, we have  $\frac{1}{T} \sum_{t=1}^t Z(t) \leq \frac{u^{\frac{2}{1+p}} T^{\frac{1-p}{1+p}}}{L_\delta^{\frac{1-p}{1+p}}}$ ,

203 each holding with probability at least  $1 - \delta/2$ . By Hölder's inequality and Lemma 1, we can bound  
 204  $B_\perp(t) \leq ub_t^{-p}$  and  $\mathbb{E}_t[\|g_t\|_2^2 \bar{\chi}_t] \leq ub_t^{1-p}$ , both with probability 1. Finally, by Lemma 2 in [52],  
 205 we have the negative drift term  $\mathbb{E}_t[g_t^\top (\Theta(t) - \Theta^*)] \leq -(1-\gamma) \sum_x \mu(x) (f_{\Theta(t)}(x) - \mathcal{V}(x))^2$ . By  
 206 telescoping sum of (11) and rearranging the terms, we have:

$$\frac{1}{T} \sum_{t=1}^T \|f_{\Theta(t)} - \mathcal{V}\|_\mu^2 \leq \frac{\mathcal{L}(\Theta(1))}{2\eta(1-\gamma)T} + \frac{1}{(1-\gamma)T} \sum_{t=1}^T B(t) + \frac{\eta}{2(1-\gamma)T} \sum_{t=1}^T \left( Z(t) + \mathbb{E}_t[\|g_t\|_2^2 \bar{\chi}_t] \right).$$

207 The proof is concluded by substituting the above high probability bounds on the sample means  
 208 of  $B(t)$ ,  $Z(t)$  and  $\mathbb{E}_t[\|g_t\|_2^2 \bar{\chi}_t]$  (via union bound and integral upper bounds), and using Jensen's  
 209 inequality on the left side of the above inequality.  $\square$

210 Most notably, this important theorem establishes that, by appropriately controlling the bias term of  
 211 dynamic gradient clipping to yield a vanishing sample mean with high probability as the number of  
 212 iterations increases, one can limit the variance of the semi-gradient, thereby resulting in the provided  
 213 global near-optimality guarantee.

214 **3 Robust Natural Actor-Critic for Policy Optimization under Heavy Tails**

215 In this section, we will study a two-timescale robust natural actor-critic algorithm (Robust NAC, in  
216 short) based on Robust TD learning, and provide finite-time bounds.

217 **3.1 Policy Optimization Problem**

218 We consider a discounted-reward Markov decision process (MDP) with a finite but arbitrarily  
219 large state space  $\mathbb{S}$ , finite action space  $\mathbb{A}$ , transition kernel  $\mathcal{P}$  and discount factor  $\gamma \in (0, 1)$ . The  
220 controlled Markov chain  $\{(S_t, A_t) \in \mathbb{S} \times \mathbb{A} : t \in \mathbb{N}\}$  has the probability transition dynamics  
221  $\mathbb{P}(S_{t+1} \in s | S_t^t, A_t^t) = \mathcal{P}_{A_t}(S_t, s)$ , for any  $s \in \mathbb{S}$ . Taking the action  $A_t \in \mathbb{A}$  at state  $S_t \in \mathbb{S}$   
222 yields a random reward of  $R_t(S_t, A_t)$  at any  $t \in \mathbb{Z}_+$ . For a given stationary randomized policy  
223  $\pi = (\pi(a|s))_{(s,a) \in \mathbb{S} \times \mathbb{A}}$ , the value function  $\mathcal{V}^\pi$  and the state-action value function (also known as  
224 Q-function)  $\mathcal{Q}^\pi$  are defined as:

$$\mathcal{V}^\pi(s) = \mathbb{E}^\pi \left[ \sum_{t=1}^{\infty} \gamma^{t-1} R_t(S_t, A_t) \middle| S_1 = s \right], \quad s \in \mathbb{S} \quad (12)$$

$$\mathcal{Q}^\pi(s, a) = \mathbb{E}^\pi \left[ \sum_{t=1}^{\infty} \gamma^{t-1} R_t(S_t, A_t) \middle| S_1 = s, A_1 = a \right], \quad (s, a) \in \mathbb{S} \times \mathbb{A}. \quad (13)$$

225 **Remark 2** (From MDP to MRP). Under any stationary randomized policy  $\pi$ , the process  
226  $(S_t, A_t)_{t>0} =: (X_t)_{t>0}$  is a Markov chain over the state-space  $\mathbb{X} = \mathbb{S} \times \mathbb{A}$ , thus  $(X_t, R_t)$  with  
227  $R_t(X_t) = R_t(S_t, A_t)$  is a Markov reward process of the kind that we analyzed in Section 2. As such,  
228 we can use Robust TD learning to evaluate  $\mathcal{V}(x) = \mathcal{Q}^\pi(x)$  for any  $x = (s, a) \in \mathbb{S} \times \mathbb{A}$ .

229 **Heavy-tailed reward.** We assume that the process  $(X_t, R_t)_{t>0}$  with the Markov chain  $X_t = (S_t, A_t)$   
230 and the reward  $R_t = R_t(X_t)$  satisfies Assumption 1. We denote the stationary distribution of  
231  $X_t = (S_t, A_t)$  under  $\pi$  as  $\mu^\pi$ .

232 **Objective.** For an initial state distribution  $\lambda$ , the objective in this work is to find the following:

$$\pi^* \in \arg \max_{\pi} \int_{\mathbb{S}} \mathcal{V}^\pi(s) \lambda(ds) =: \mathcal{V}^\pi(\lambda), \quad (14)$$

233 over the class of stationary randomized policies.

234 **Policy parameterization.** In this work, we consider a finite but arbitrarily large state space  $\mathbb{S}$ , and for  
235 such problems, the tabular methods do not scale [49, 3]. In order to address this scalability issue, we  
236 consider widely-used softmax parameterization with linear function approximation: for a given set of  
237 feature vectors  $\{\Phi(s, a) \in \mathbb{R}^d : s \in \mathbb{S}, a \in \mathbb{A}\}$  and policy parameter  $W \in \mathbb{R}^d$ ,

$$\pi_W(a|s) = \frac{\exp(W^\top \Phi(s, a))}{\sum_{a' \in \mathbb{A}} \exp(W^\top \Phi(s, a'))}, \quad (s, a) \in \mathbb{S} \times \mathbb{A}. \quad (15)$$

238 In the following subsection, we will describe the robust natural actor-critic algorithm.

239 **3.2 Robust Natural Actor-Critic Algorithm**

240 For any iteration  $k \geq 1$ , we denote  $\pi_k := \pi_{W(k)}$  throughout the policy optimization iterations.

241 For samples  $\mathcal{D}^{(k)} = \{(S_{t,k}, A_{t,k}, R_{t,k}, S'_{t,k}, A'_{t,k}) : t \geq 1\}$ , given  $(b_{t,k})_{t,k \in \mathbb{Z}_+}$  and  $\rho > 0$ , Robust  
242 NAC Algorithm is summarized in Algorithm 2.

243 **Remark 3.** The optimal solution  $\Theta_k^* \in \arg \min_{\Theta \in \mathbb{R}^d} \mathbb{E}_{x=(s,a)} \left| \langle \Theta, \Phi(x) \rangle - \mathcal{Q}^{\pi_k}(x) \right|^2$  is a good approxi-  
244 mation of the natural policy gradient:

$$u_k = [G(\pi_k)]^{-1} \nabla_W \mathcal{V}^{\pi_k}(\lambda) \in \arg \min_{w \in \mathbb{R}^d} \mathbb{E}_{(s,a) \sim \mathcal{d}_{\lambda}^{\pi_k} \otimes \pi_k(\cdot|s)} \left| \langle w, \nabla_W \log \pi_k(a|s) \rangle - \mathcal{A}^{\pi_k}(s, a) \right|^2,$$

245 which follows from Jensen's inequality and leads to the Q-NPG [1]. For a detailed discussion, refer  
246 to Appendix B.

---

**Algorithm 2:** Robust Natural Actor-Critic Algorithm

---

**Inputs:** clipping radii  $(b_t)_{t \geq 1}$ , projection radius  $\rho > 0$ , learning rate  $\alpha > 0$ ,  $L_\delta > 0$   
**for**  $k = 1, 2, \dots, K$  **do**  
  Set  $\Theta_k(1) = 0$  // initialization: max-entropy policy  
  **for**  $t = 1, 2, \dots, T$  **do**  
    Set  $g_t^{(k)}(\Theta_k(t)) = \left( R_{t,k} + \gamma f_{\Theta_k(t)}(S'_{t,k}, A'_{t,k}) - f_{\Theta_k(t)}(S_{t,k}, A_{t,k}) \right) \Phi(S_{t,k}, A_{t,k})$ .  
     $\Theta_k(t+1) = \Pi_{B_2(0, \rho)} \left\{ \Theta_k(t) + \eta_t \cdot g_t^{(k)}(\Theta_k(t)) \cdot \mathbb{1} \{ \|g_t^{(k)}(\Theta_k(t))\|_2 \leq b_t \} \right\}$   
  **end for**  
   $W(k+1) = W(k) + \alpha \cdot \frac{1}{T} \sum_{t=1}^T \Theta_k(t)$   
**end for**

---

### 247 3.3 Finite-Time Bounds for Robust Natural Actor-Critic

248 In this subsection, we will provide finite-time bounds for Robust NAC.

249 We assume that the resulting Markov reward process under  $\pi_k$  for each  $k$  satisfies Assumptions 1-3  
250 with stationary distribution  $\mu^{\pi_k}$  and  $u_k \geq \mathbb{E}[|R_{t,k}(S_{t,k}, A_{t,k})|^{1+p} | S_{t,k}, A_{t,k}]$ . We assume that the  
251 dataset  $\mathcal{D}^{(k)}$  is obtained independently at each iteration  $k \geq 1$  for simplicity, with  $(S_{t,k}, A_{t,k}) \stackrel{iid}{\sim} \mu^{\pi_k}$   
252 and  $S'_{t,k} \sim \mathcal{P}_{A_{t,k}}(S_{t,k}, \cdot)$  and  $A_{t,k} \sim \pi_k(\cdot | S_{t,k})$  according to Assumption 2a under the stationary  
253 distribution  $\mu^{\pi_k} = [\mu^{\pi_k}(s, a)]_{s \in \mathbb{S}, a \in \mathbb{A}}$  under  $\pi_k$ . We make the following standard assumption for  
254 policy optimization, which is common in the policy gradient literature [1, 55, 33].

255 **Assumption 4** (Concentrability). *For any  $k \geq 1$ , we assume that there exists  $C_{\text{conc}} < \infty$  such that:*

$$\max_{(s,a) \in \mathbb{S} \times \mathbb{A}} \frac{d_{\lambda}^{\pi^*}(s) \pi^*(a|s)}{\mu^{\pi_k}(s, a)} \leq C_{\text{conc}}, \quad (16)$$

256 where  $\mu^{\pi_k}$  is the stationary distribution of  $(S_{t,k}, A_{t,k})_{t \geq 1}$  under  $\pi_k$ .

257 **Theorem 4** (Finite-time bounds for Robust NAC). Under Assumptions 1-4 for any  $k \geq 1$ , for any  
258  $\delta \in (0, 1)$  and  $T, K > 1$ , Robust NAC with  $\rho \geq \max_k \|\Theta_k^*\|_2$ ,  $b_{t,k} = \left( \frac{u_k T}{\log(4T/\delta)} \right)^{\frac{1}{1+p}}$ , learning rates

259  $\eta = \frac{\sqrt{2(1-\gamma)\rho L_\delta^{\frac{1-p}{2(1+p)}}}}{(\max_{1 \leq k \leq K} u_k T)^{\frac{1}{1+p}}}$  and  $\alpha = \frac{\sqrt{\log |\mathbb{A}|}}{\rho \sqrt{K}}$  achieves the following with probability at least  $1 - \delta$ :

$$\min_{1 \leq k \leq K} \{ \mathcal{V}^{\pi^*}(\lambda) - \mathcal{V}^{\pi_k}(\lambda) \} \leq \frac{2\rho \sqrt{\log |\mathbb{A}|}}{(1-\gamma)\sqrt{K}} + \sqrt{\frac{(\max_{1 \leq k \leq K} u_k)^{\frac{1}{1+p}} C_{\text{conc}} \rho}{(1-\gamma)^3 T^{\frac{p}{1+p}}} \left( 3L_\delta^{-\frac{1-p}{2(1+p)}} + 7L_\delta^{\frac{p}{1+p}} \right)},$$

260 where  $L_\delta = \log(4T/\delta)$ .

261 The proof of Theorem 4 can be found in Appendix B.

262 **Remark 4** (Sample Complexity of Robust NAC). An immediate consequence of Theorem 4 is as  
263 follows: the best iterate error decays at a rate  $\tilde{O}\left(\frac{1}{\sqrt{K}}\right) + \tilde{O}\left(\frac{1}{T^{\frac{p}{2(1+p)}}}\right)$  after  $K$  iterations of natural  
264 policy gradient, which contains  $T$  steps of Robust TD learning per iteration. As such, in order to  
265 achieve  $\varepsilon > 0$  error, one needs  $T \times K = \tilde{O}(\varepsilon^{-2-2(1+p)/p})$  samples.

266 **Remark 5.** Theorem 4 can be easily extended to expected error bounds and the full-rank case, where  
267 we would have  $\tilde{O}(K^{-1/2} + T^{-p})$  by using Theorem 1. By extending the analysis in Theorem 2, one  
268 can prove results for Markovian sampling as well.

## 269 4 Numerical Results

270 In this section, we present numerical results for Robust TD learning and its non-robust counterpart.

271 **(1) Randomly-Generated MRP.** In the first example, we consider a randomly-generated MRP with  
272  $|\mathbb{X}| = 256$ . The transition kernel is randomly generated such that  $\mathcal{P}(x, x') \stackrel{iid}{\sim} \text{Unif}(0, 1)$ , and row-  
273 wise normalized to obtain a stochastic matrix. The feature dimension is  $d = 128$ , random features are



274 generated according to the  $\chi$ -squared distribution  $\Phi(x) = \Phi_0(x)/\|\Phi_0(x)\|_2$  with  $\Phi_0(x) \sim \mathcal{N}(0, I_d)$   
 275 for all  $x \in \mathbb{X}$ ,  $\Theta^* \sim 3U/\sqrt{d}$  for  $U \sim \text{Unif}^d(0, 1)$  and  $\Psi = [-\Phi^\top(x)]_{x \in \mathbb{X}}$ . The discount factor is  
 276  $\gamma = 0.9$ , and the reward is  $R_t(X_t) = r(X_t) + N_t - \mathbb{E}[N_t]$  with  $N_t \stackrel{iid}{\sim} \text{Pareto}(1, 1.2)$ . Mean squared  
 277 error (2) under Robust TD learning and TD learning with the clipping radius  $b_t = t$  and diminishing  
 step-size  $\eta_t = \frac{1}{\lambda_{\min}(1-\gamma)t}$  in Theorem 1 and projection radius  $\rho = 30$  are shown in Figure 2. Despite

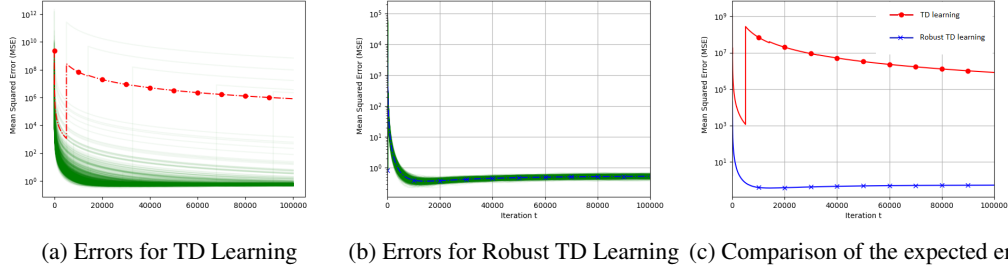

Figure 2: Performance of TD learning and Robust TD learning under heavy-tailed rewards of tail index 1.2. Each faded green line is the MSE for an individual trial, and the solid lines with markers indicates the average error performance for **TD learning** and **Robust TD learning**.

278 diminishing step-size and projection, TD learning fails miserably often and in expectation due to  
 279 the outliers in the reward that lead to extremely large errors (Figure 2a). On the other hand, for the  
 280 same feature vectors, state and reward realizations, Robust TD learning effectively eliminates them in  
 281 every sample path, and achieves good and consistent performance despite extremely heavy-tailed  
 282 reward and gradient noise with tail index 1.2 (Figure 2a).  
 283

284 **(2) Circular Random Walk.** In this example, we consider a circular random walk for  $\mathbb{X} =$   
 285  $\{1, 2, \dots, 256\}$ , where each state  $x$  is modulo- $|\mathbb{X}|$  [58]. The transition matrix is generated as  
 286  $\mathcal{P}(x, x') = 1/3$  if  $x = x'$  and  $\mathcal{P}(x, x') = 1/24$  if  $0 < |x - x'| \leq 8$ . The reward and random feature  
 287 generation is the same as the first example. The performances of TD learning and Robust TD learning  
 288 in this structured case after 1000 trials are given in Figure 3.

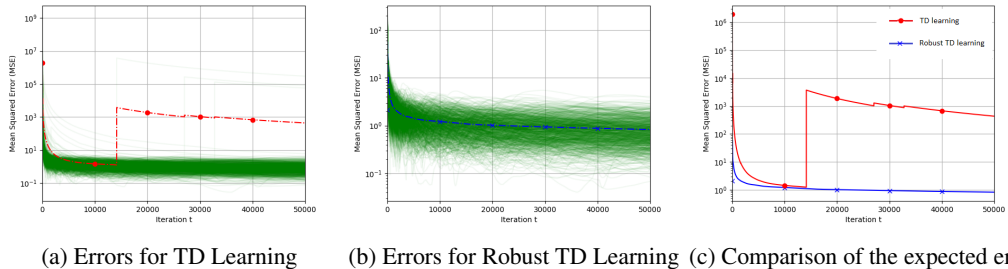

Figure 3: Performances of Robust TD learning and TD learning for the circular random walk under heavy-tailed reward with tail index 1.2. Each faded green line is the error trajectory for an individual trial, and the solid lines indicate the expected errors for **TD learning** and **Robust TD learning**.

289 A similar behavior as the randomly-generated MRP is observed in this example: due to outliers, TD  
 290 learning fails miserably, while Robust TD learning achieves good performance consistently.

## 291 5 Conclusion

292 In this paper, we considered RL problem with heavy-tailed rewards, and proposed robust TD learning  
 293 and NAC variants with a dynamic gradient clipping mechanism with provable performance guarantees,  
 294 both in expectation and with high probability. Motivated by the results in this work, it would be  
 295 interesting to explore single-timescale robust NAC and off-policy NAC for future work.

296 **References**

- 297 [1] Alekh Agarwal, Sham M Kakade, Jason D Lee, and Gaurav Mahajan. Optimality and approxi-  
298 mation with policy gradient methods in markov decision processes. In *Conference on Learning*  
299 *Theory*, pages 64–66. PMLR, 2020.
- 300 [2] Mukul Agarwal, Vivek S Borkar, and Abhay Karandikar. Structural properties of optimal  
301 transmission policies over a randomly varying channel. *IEEE Transactions on Automatic*  
302 *Control*, 53(6):1476–1491, 2008.
- 303 [3] Dimitri P Bertsekas and John N Tsitsiklis. *Neuro-dynamic programming*. Athena Scientific,  
304 1996.
- 305 [4] Jalaj Bhandari, Daniel Russo, and Raghav Singal. A finite time analysis of temporal difference  
306 learning with linear function approximation. *arXiv preprint arXiv:1806.02450*, 2018.
- 307 [5] Shalabh Bhatnagar, Richard S Sutton, Mohammad Ghavamzadeh, and Mark Lee. Natural  
308 actor–critic algorithms. *Automatica*, 45(11):2471–2482, 2009.
- 309 [6] Sébastien Bubeck, Nicolo Cesa-Bianchi, and Gábor Lugosi. Bandits with heavy tail. *IEEE*  
310 *Transactions on Information Theory*, 59(11):7711–7717, 2013.
- 311 [7] Qi Cai, Zhuoran Yang, Jason D Lee, and Zhaoran Wang. Neural temporal-difference learning  
312 converges to global optima. *Advances in Neural Information Processing Systems*, 32, 2019.
- 313 [8] Semih Cayci, Atilla Eryilmaz, and Rayadurgam Srikant. Budget-constrained bandits over  
314 general cost and reward distributions. In *International Conference on Artificial Intelligence and*  
315 *Statistics*, pages 4388–4398. PMLR, 2020.
- 316 [9] Rong-Rong Chen and Sean Meyn. Value iteration and optimization of multiclass queueing  
317 networks. *Queueing Systems*, 32:65–97, 1999.
- 318 [10] Ashok Cutkosky and Harsh Mehta. High-probability bounds for non-convex stochastic opti-  
319 mization with heavy tails. *Advances in Neural Information Processing Systems*, 34:4883–4895,  
320 2021.
- 321 [11] David A Freedman. On tail probabilities for martingales. *the Annals of Probability*, pages  
322 100–118, 1975.
- 323 [12] Carla P Gomes and Bart Selman. Algorithm portfolios. *Artificial Intelligence*, 126(1-2):43–62,  
324 2001.
- 325 [13] Carla P Gomes, Bart Selman, Nuno Crato, and Henry Kautz. Heavy-tailed phenomena in  
326 satisfiability and constraint satisfaction problems. *Journal of automated reasoning*, 24(1-2):67,  
327 2000.
- 328 [14] Carla P Gomes, Bart Selman, Henry Kautz, et al. Boosting combinatorial search through  
329 randomization. *AAAI/IAAI*, 98:431–437, 1998.
- 330 [15] Mert Gurbuzbalaban, Umut Simsekli, and Lingjiong Zhu. The heavy-tail phenomenon in sgd.  
331 In *International Conference on Machine Learning*, pages 3964–3975. PMLR, 2021.
- 332 [16] Tuomas Haarnoja, Aurick Zhou, Pieter Abbeel, and Sergey Levine. Soft actor-critic: Off-  
333 policy maximum entropy deep reinforcement learning with a stochastic actor. In *International*  
334 *Conference on Machine Learning*, pages 1861–1870. PMLR, 2018.
- 335 [17] Mor Harchol-Balter. The effect of heavy-tailed job size distributions on computer system  
336 design. In *Proc. of ASA-IMS Conf. on Applications of Heavy Tailed Distributions in Economics,*  
337 *Engineering and Statistics*, 1999.
- 338 [18] Holger H Hoos and Thomas Stützle. *Stochastic local search: Foundations and applications*.  
339 Elsevier, 2004.
- 340 [19] Daniel Hsu and Sivan Sabato. Heavy-tailed regression with a generalized median-of-means. In  
341 *International Conference on Machine Learning*, pages 37–45. PMLR, 2014.

- 342 [20] Yu-Pin Hsu, Eytan Modiano, and Lingjie Duan. Scheduling algorithms for minimizing age of  
343 information in wireless broadcast networks with random arrivals. *IEEE Transactions on Mobile*  
344 *Computing*, 19(12):2903–2915, 2019.
- 345 [21] Marat Ibragimov, Rustam Ibragimov, and Johan Walden. *Heavy-tailed distributions and*  
346 *robustness in economics and finance*, volume 214. Springer, 2015.
- 347 [22] Predrag R Jelenković and Jian Tan. Is aloha causing power law delays? In *Managing Traffic*  
348 *Performance in Converged Networks: 20th International Teletraffic Congress, ITC20 2007,*  
349 *Ottawa, Canada, June 17-21, 2007. Proceedings*, pages 1149–1160. Springer, 2007.
- 350 [23] Predrag R Jelenković and Jian Tan. Characterizing heavy-tailed distributions induced by  
351 retransmissions. *Advances in Applied Probability*, 45(1):106–138, 2013.
- 352 [24] Chi Jin, Zhuoran Yang, Zhaoran Wang, and Michael I Jordan. Provably efficient reinforcement  
353 learning with linear function approximation. In *Conference on Learning Theory*, pages 2137–  
354 2143. PMLR, 2020.
- 355 [25] Sham Kakade and John Langford. Approximately optimal approximate reinforcement learning.  
356 In *In Proc. 19th International Conference on Machine Learning*. Citeseer, 2002.
- 357 [26] Sham M Kakade. A natural policy gradient. *Advances in neural information processing systems*,  
358 14, 2001.
- 359 [27] Yuan Ke, Stanislav Minsker, Zhao Ren, Qiang Sun, and Wen-Xin Zhou. User-friendly covariance  
360 estimation for heavy-tailed distributions. *Statistical Science*, 34(3):454–471, 2019.
- 361 [28] Byungchan Kim, Jooyoung Park, Shinsuk Park, and Sungchul Kang. Impedance learning for  
362 robotic contact tasks using natural actor-critic algorithm. *IEEE Transactions on Systems, Man,*  
363 *and Cybernetics, Part B (Cybernetics)*, 40(2):433–443, 2009.
- 364 [29] Vijay R Konda and John N Tsitsiklis. Actor-critic algorithms. In *Advances in neural information*  
365 *processing systems*, pages 1008–1014. Citeseer, 2000.
- 366 [30] Lars Kotthoff. Algorithm selection for combinatorial search problems: A survey. *Data mining*  
367 *and constraint programming: Foundations of a cross-disciplinary approach*, pages 149–190,  
368 2016.
- 369 [31] Michail G Lagoudakis, Michael L Littman, et al. Algorithm selection using reinforcement  
370 learning. In *ICML*, pages 511–518, 2000.
- 371 [32] Kyungjae Lee, Hongjun Yang, Sungbin Lim, and Songhwai Oh. Optimal algorithms for  
372 stochastic multi-armed bandits with heavy tailed rewards. *Advances in Neural Information*  
373 *Processing Systems*, 33:8452–8462, 2020.
- 374 [33] Boyi Liu, Qi Cai, Zhuoran Yang, and Zhaoran Wang. Neural proximal/trust region policy  
375 optimization attains globally optimal policy. *arXiv preprint arXiv:1906.10306*, 2019.
- 376 [34] Mico Loretan and Peter CB Phillips. Testing the covariance stationarity of heavy-tailed time  
377 series: An overview of the theory with applications to several financial datasets. *Journal of*  
378 *empirical finance*, 1(2):211–248, 1994.
- 379 [35] Gábor Lugosi and Shahar Mendelson. Mean estimation and regression under heavy-tailed  
380 distributions: A survey. *Foundations of Computational Mathematics*, 19(5):1145–1190, 2019.
- 381 [36] Benoit Mandelbrot. New methods in statistical economics. *Journal of political economy*,  
382 71(5):421–440, 1963.
- 383 [37] Mark M Meerschaert and Hans-Peter Scheffler. Moving averages of random vectors with  
384 regularly varying tails. *Journal of Time Series Analysis*, 21(3):297–328, 2000.
- 385 [38] Jincheng Mei, Chenjun Xiao, Csaba Szepesvari, and Dale Schuurmans. On the global con-  
386 vergence rates of softmax policy gradient methods. In *International Conference on Machine*  
387 *Learning*, pages 6820–6829. PMLR, 2020.

- 388 [39] Sean Meyn. *Control techniques for complex networks*. Cambridge University Press, 2008.
- 389 [40] Stanislav Minsker. Geometric median and robust estimation in banach spaces. *Bernoulli*, pages  
390 2308–2335, 2015.
- 391 [41] Stanislav Minsker. Sub-gaussian estimators of the mean of a random matrix with heavy-tailed  
392 entries. *The Annals of Statistics*, 46(6A):2871–2903, 2018.
- 393 [42] Rajeev Motwani and Prabhakar Raghavan. *Randomized algorithms*. Cambridge university  
394 press, 1995.
- 395 [43] Jayakrishnan Nair, Adam Wierman, and Bert Zwart. The fundamentals of heavy-tails: Prop-  
396 erties, emergence, and identification. In *Proceedings of the ACM SIGMETRICS/international  
397 conference on Measurement and modeling of computer systems*, pages 387–388, 2013.
- 398 [44] Arkadij Semenovič Nemirovskij and David Borisovich Yudin. *Problem complexity and method  
399 efficiency in optimization*. Wiley-Interscience, 1983.
- 400 [45] Jan Peters and Stefan Schaal. Natural actor-critic. *Neurocomputing*, 71(7-9):1180–1190, 2008.
- 401 [46] Han Shao, Xiaotian Yu, Irwin King, and Michael R Lyu. Almost optimal algorithms for linear  
402 stochastic bandits with heavy-tailed payoffs. *Advances in Neural Information Processing  
403 Systems*, 31, 2018.
- 404 [47] Matthew Streeter and Daniel Golovin. An online algorithm for maximizing submodular  
405 functions. *Advances in Neural Information Processing Systems*, 21, 2008.
- 406 [48] Richard S Sutton. Learning to predict by the methods of temporal differences. *Machine learning*,  
407 3(1):9–44, 1988.
- 408 [49] Richard S Sutton and Andrew G Barto. *Reinforcement learning: An introduction*. MIT press,  
409 2018.
- 410 [50] Richard S Sutton, David A McAllester, Satinder P Singh, Yishay Mansour, et al. Policy gradient  
411 methods for reinforcement learning with function approximation. In *NIPs*, volume 99, pages  
412 1057–1063. Citeseer, 1999.
- 413 [51] Joel A Tropp. Freedman’s inequality for matrix martingales. *Electronic Communications in  
414 Probability*, 16(25):262–270, 2011.
- 415 [52] John N Tsitsiklis and Benjamin Van Roy. An analysis of temporal-difference learning with  
416 function approximation. *IEEE transactions on automatic control*, 42(5):674–690, 1997.
- 417 [53] Martin J Wainwright. *High-dimensional statistics: A non-asymptotic viewpoint*, volume 48.  
418 Cambridge university press, 2019.
- 419 [54] Hongjian Wang, Mert Gurbuzbalaban, Lingjiong Zhu, Umut Simsekli, and Murat A Erdogdu.  
420 Convergence rates of stochastic gradient descent under infinite noise variance. *Advances in  
421 Neural Information Processing Systems*, 34:18866–18877, 2021.
- 422 [55] Lingxiao Wang, Qi Cai, Zhuoran Yang, and Zhaoran Wang. Neural policy gradient methods:  
423 Global optimality and rates of convergence. *arXiv preprint arXiv:1909.01150*, 2019.
- 424 [56] Ward Whitt. The impact of a heavy-tailed service-time distribution upon the m/gi/s waiting-time  
425 distribution. *Queueing Systems*, 36(1-3):71–87, 2000.
- 426 [57] Ronald J Williams. Simple statistical gradient-following algorithms for connectionist reinforce-  
427 ment learning. *Machine learning*, 8(3-4):229–256, 1992.
- 428 [58] Eric Xia and Martin Wainwright. Krylov–bellman boosting: Super-linear policy evaluation in  
429 general state spaces. In *International Conference on Artificial Intelligence and Statistics*, pages  
430 9137–9166. PMLR, 2023.
- 431 [59] Tengyu Xu, Zhe Wang, and Yingbin Liang. Improving sample complexity bounds for (natural)  
432 actor-critic algorithms. *arXiv preprint arXiv:2004.12956*, 2020.
- 433 [60] Tengyu Xu, Zhe Wang, and Yingbin Liang. Non-asymptotic convergence analysis of two  
434 time-scale (natural) actor-critic algorithms. *arXiv preprint arXiv:2005.03557*, 2020.

## 435 A Proofs for Robust TD Learning

436 The following lemma will be critical in our proofs.

437 **Lemma 2** (Lemma 4 in [52]). *For any two vectors  $\widehat{V}, V \in \mathbb{R}^{|\mathbb{X}|}$ ,*

$$\|\mathcal{T}\widehat{V} - \mathcal{T}V\|_\mu \leq \gamma \cdot \|\widehat{V} - V\|_\mu,$$

438 *where*

$$(\mathcal{T}V)(x) = r(x) + \gamma \sum_{x' \in \mathbb{X}} \mathcal{P}(x, x')V(x'), \quad (17)$$

439 *is the Bellman operator.*

440 *Proof of Theorem. 1.* The proof follows the Lyapunov approach in [4]. Let  $\mathcal{L}(\Theta) = \|\Theta - \Theta^*\|_2^2$  be  
441 the Lyapunov function for any  $\Theta \in \mathbb{R}^d$ . Then, by the non-expansivity of  $\Pi_{\mathcal{B}_2(0, \rho)}$ , we have:

$$\begin{aligned} \mathcal{L}(\Theta(t+1)) &\leq \mathcal{L}(\Theta(t)) + \eta^2 \|g_t(\Theta(t))\|_2^2 \mathbb{1}\{\|g_t(\Theta(t))\|_2 \leq b_t\} \\ &\quad - 2\eta g_t(\Theta(t))^\top (\Theta(t) - \Theta^*) \mathbb{1}\{\|g_t(\Theta(t))\|_2 \leq b_t\}. \end{aligned} \quad (18)$$

442 Taking conditional expectation given  $\mathcal{F}_t$  and using the fact that  $\mathbb{1}\{\|g_t(\Theta(t))\|_2 > b_t\} = 1 -$   
443  $\mathbb{1}\{\|g_t(\Theta(t))\|_2 \leq b_t\}$ , we get:

$$\begin{aligned} \mathbb{E}[\mathcal{L}(\Theta(t+1)) | \mathcal{F}_t] &\leq \mathcal{L}(\Theta(t)) + 2\eta \mathbb{E}_t[g_t^\top(\Theta(t))(\Theta(t) - \Theta^*)] \\ &\quad - 2\eta \mathbb{E}[g_t(\Theta(t))^\top (\Theta(t) - \Theta^*) \mathbb{1}\{\|g_t(\Theta(t))\|_2 > b_t\} | \mathcal{F}_t] + \eta^2 u b_t^{1-p}, \end{aligned} \quad (19)$$

444 where we used

$$\begin{aligned} \mathbb{E}[\|g_t(\Theta(t))\|_2^2 \mathbb{1}\{\|g_t(\Theta(t))\|_2 \leq b_t\} | \mathcal{F}_t] &\leq \mathbb{E}[\|g_t(\Theta(t))\|_2^{1+p} b_t^{1-p} | \mathcal{F}_t], \\ &\leq u b_t^{1-p}, \end{aligned} \quad (20)$$

445 in the last term. Now, for  $\mathbb{E}_t[g_t^\top(\Theta(t))(\Theta(t) - \Theta^*)]$ , we have the following inequality:

$$\begin{aligned} \mathbb{E}_t[g_t^\top(\Theta(t))(\Theta(t) - \Theta^*)] &= \mathbb{E}_t[(R_t + \gamma f_{\Theta(t)}(X'_t) - f_{\Theta(t)}(X_t))(f_{\Theta(t)}(X_t) - \mathcal{V}(X_t))], \\ &= \mathbb{E}_t\left[\left((\mathcal{T}f_{\Theta(t)})(X_t) - f_{\Theta(t)}(X_t)\right)\left(f_{\Theta(t)}(X_t) - \mathcal{V}(X_t)\right)\right], \end{aligned}$$

446 where  $\mathcal{T}$  is the Bellman operator (17). By using the fact that the value function  $\mathcal{V}$  is the fixed point of  
447 the Bellman operator  $\mathcal{T}$ , we have the following:

$$\begin{aligned} &\mathbb{E}_t\left[\left((\mathcal{T}f_{\Theta(t)})(X_t) - f_{\Theta(t)}(X_t)\right)\left(f_{\Theta(t)}(X_t) - \mathcal{V}(X_t)\right)\right] \\ &= \mathbb{E}_t\left[\left(\mathcal{T}f_{\Theta(t)}(X_t) - \mathcal{T}\mathcal{V}(X_t)\right)\left(f_{\Theta(t)}(X_t) - \mathcal{V}(X_t)\right)\right] - \mathbb{E}_t\left[\left(f_{\Theta(t)}(X_t) - \mathcal{V}(X_t)\right)^2\right]. \end{aligned} \quad (21)$$

448 By using Lemma 2, we conclude that:

$$\mathbb{E}[g_t^\top(\Theta(t))(\Theta(t) - \Theta^*)] \leq -(1-\gamma) \sum_{x \in \mathbb{X}} \mu(x) \left(f_{\Theta(t)}(x) - \mathcal{V}(x)\right)^2 = -(1-\gamma) \|f_{\Theta(t)} - \mathcal{V}\|_\mu^2. \quad (22)$$

449 Then, we can rewrite (19) as follows:

$$\begin{aligned} \mathbb{E}[\mathcal{L}(\Theta(t+1)) | \mathcal{F}_t] &\leq \mathcal{L}(\Theta(t)) - 2(1-\gamma)\eta \|f_{\Theta(t)} - \mathcal{V}\|_\mu^2 \\ &\quad - 2\eta \mathbb{E}[g_t(\Theta(t))^\top (\Theta(t) - \Theta^*) \mathbb{1}\{\|g_t(\Theta(t))\|_2 > b_t\} | \mathcal{F}_t] + \eta^2 u b_t^{1-p}, \end{aligned} \quad (23)$$

450 The bias introduced by using the gradient clipping can be bounded as follows:

$$\begin{aligned} \mathbb{E}[g_t(\Theta(t))^\top (\Theta(t) - \Theta^*) \mathbb{1}\{\|g_t(\Theta(t))\|_2 > b_t\} | \mathcal{F}_t] \\ \leq 2\rho \mathbb{E}[\|g_t(\Theta(t))\|_2 \mathbb{1}\{\|g_t(\Theta(t))\|_2 > b_t\} | \mathcal{F}_t], \end{aligned} \quad (24)$$

451 which follows from Cauchy-Schwarz inequality, triangle inequality and the fact that  
452  $\max\{\|\Theta(t)\|_2, \|\Theta^*\|_2\} \leq \rho$  due to projection. Using Hölder's inequality on the RHS of (24),  
453 we obtain:

$$\mathbb{E}[g_t(\Theta(t))^\top (\Theta(t) - \Theta^*) \mathbb{1}\{\|g_t(\Theta(t))\|_2 > b_t\} | \mathcal{F}_t] \leq 2\rho u^{\frac{1}{1+p}} [\mathbb{P}(\|g_t(\Theta(t))\|_2 > b_t | \mathcal{F}_t)]^{\frac{p}{1+p}}.$$

454 Using Markov's inequality, we bound the bias due to using the clipped stochastic gradient as:

$$\mathbb{E}[g_t(\Theta(t))^\top (\Theta(t) - \Theta^*) \mathbb{1}\{\|g_t(\Theta(t))\|_2 > b_t\} | \mathcal{F}_t] \leq 2\rho u b_t^{-p}. \quad (25)$$

455 Substituting (25) into (19), and taking expectation over the trajectory  $\mathcal{F}_t$ , we obtain:

$$\mathbb{E}[\mathcal{L}(\Theta(t+1)) - \mathcal{L}(\Theta(t))] \leq -2\eta(1-\gamma)\|f_{\Theta(t)} - \mathcal{V}\|_\mu^2 + 4\eta\rho u b_t^{-p} + \eta^2 u b_t^{1-p}.$$

456 Telescoping sum over  $t = 1, 2, \dots, T$  yields:

$$\begin{aligned} \mathbb{E}\mathcal{L}(\Theta(T+1)) - \mathcal{L}(\Theta(1)) &\leq -2\eta(1-\gamma) \sum_{t=1}^T \left( \mathbb{E}\|f_{\Theta(t)} - \mathcal{V}\|_\mu^2 \right) \\ &\quad + 4\eta\rho u \int_0^T b_s^{-p} ds + \eta^2 u \int_0^T b_s^{1-p} ds. \end{aligned} \quad (26)$$

457 Rearranging the terms, using Jensen's inequality and  $\mathcal{L}(\Theta(1)) \leq 4\rho^2$ , and substituting the step-size  
458  $\eta$  yields the result.

459 (b) For the full-rank case, note that

$$\begin{aligned} \|f_\Theta - \mathcal{V}\|_\mu^2 &= (\Theta - \Theta^*)^\top \left( \sum_{x \in \mathbb{X}} \mu(x) \Phi(x) \Phi^\top(x) \right) (\Theta - \Theta^*), \\ &\geq \lambda_{\min} \|\Theta - \Theta^*\|_2^2, \end{aligned}$$

460 which implies (together with (23)) that:

$$\mathbb{E}\|\Theta(t+1) - \Theta^*\|_2^2 \leq (1 - \eta_t \lambda(1-\gamma)) \|\Theta(t) - \Theta^*\|_2^2 - \eta_t(1-\gamma) \mathbb{E}\|f_{\Theta(t)} - \mathcal{V}\|_\mu^2 + 4\eta_t \rho u b_t^{-p} + \eta_t^2 b_t^{1-p} u.$$

461 With the step-size choice  $\eta_t = \frac{1}{(1-\gamma)\lambda t}$ , we obtain by induction:

$$\mathbb{E}\|\Theta(t+1) - \Theta^*\|_2^2 \leq -\frac{1}{\lambda t} \sum_{k=1}^t \mathbb{E}\|f_{\Theta(k)} - \mathcal{V}\|_\mu^2 + \frac{4\rho u}{\lambda_{\min} t} \sum_{k=1}^t b_k^{-p} + \frac{u}{\lambda_{\min}^2 t} \sum_{k=1}^t \frac{b_k^{1-p}}{k}.$$

462 By rearranging the terms and using the integral bound for the summations above, and using the  
463 Jensen's inequality for the  $\mu$ -norm, we obtain the result.  $\square$

464 *Proof of Theorem 2.* Let  $\mathcal{F}_t^{++} = \sigma(\Theta(1), \dots, \Theta(t), X_t, X_{t+1})$  and  $\mathbb{E}_t^{++}[\cdot] = \mathbb{E}[\cdot | \mathcal{F}_t^{++}]$ . Also, let

$$\begin{aligned} \hat{g}(\Theta) &= \mathbb{E}_t^{++} g_t(\Theta), \\ \bar{g}(\Theta) &= \sum_{x, x' \in \mathbb{X}} \mu(x) \mathcal{P}(x, x') (r(x) + \gamma f_\Theta(x') - f_\Theta(x)) \Phi(x). \end{aligned}$$

The bias due to Markovian sampling is:

$$Z_t(\Theta) = \left( \hat{g}_t(\Theta) - \bar{g}(\Theta) \right)^\top (\Theta - \Theta^*).$$

465 With the above definitions, the Lyapunov drift at time  $t \geq 1$  can be bounded as follows:

$$\begin{aligned} \mathbb{E}_t^{++} \|\Theta(t+1) - \Theta^*\|_2^2 &\leq \|\Theta(t) - \Theta^*\|_2^2 - 2\eta(1-\gamma) \|\mathcal{V} - f_{\Theta(t)}\|_\mu^2 + \eta^2 \mathbb{E}_t^{++} [\|g_t(\Theta(t))\|_2^2 \chi_t] \\ &\quad + 2\eta \hat{g}^\top(\Theta(t) - \Theta^*) \bar{\chi}_t + 2\eta Z_t(\Theta(t)), \end{aligned}$$

466 where  $\chi_t = 1 - \bar{\chi}_t = \mathbb{1}\{\|g_t(\Theta(t))\|_2 \leq b_t\}$ . Compared to the case of iid sampling in Theorem 1, the  
467 difference is  $Z_t(\Theta(t))$ . In the following, we bound  $\mathbb{E} Z_t(\Theta(t))$  by using the mixing time analysis in  
468 [4]. First, we provide two essential properties of  $Z_t(\Theta)$  to verify the conditions in Lemma 10 in [4].

469 **Lemma 3.** *Under Assumption 1, we have:*

$$|Z_t(\Theta)| \leq (1 + 2\rho)^2, \quad \Theta \in B_2(0, \rho), \quad (27)$$

$$|Z_t(\Theta) - Z_t(\Theta')| \leq 6(1 + 2\rho)^2 \|\Theta - \Theta'\|_2^2, \quad \Theta, \Theta' \in B_2(0, \rho). \quad (28)$$

470 Thus, we have:

$$\mathbb{E}Z_t(\Theta(t)) \leq \mathbb{E}[Z_t(\Theta(t-\tau))] + 6(1+2\rho)^2\mathbb{E}\|\Theta(t) - \Theta(t-\tau)\|_2. \quad (29)$$

471 We have the following inequality:

$$\|\Theta(t) - \Theta(t-\tau)\|_2 \leq \sum_{k=t-\tau}^{t-1} \|\Theta(k+1) - \Theta(k)\|_2 \leq \eta \sum_{k=t-\tau}^{t-1} \|g_k(\Theta(k))\|_2 \chi_t.$$

Taking the expectation above, and using Hölder's inequality:

$$\mathbb{E}\|\Theta(t) - \Theta(t-\tau)\|_2 \leq \sum_{k=t-\tau}^{t-1} \left( \mathbb{E}[\|g_k(\Theta(k))\|_2^{1+p}] \right)^{\frac{1}{1+p}} \leq \eta \tau u^{\frac{1}{1+p}}.$$

By using the information theoretic bound in Lemma 9 in [4], we obtain

$$\mathbb{E}Z_t(\Theta(t-\tau)) \leq 2(1+2\rho)^2\eta,$$

472 under the uniform ergodicity assumption in Assumption 1. Using the last two inequalities in (29), we  
473 obtain:

$$\mathbb{E}Z_t(\Theta(t)) \leq 2(1+2\rho)^2 \left( 1 + 6\tau u^{\frac{1}{1+p}} \right) \eta. \quad (30)$$

474 By using the above result, we obtain the ultimate inequality for the Lyapunov drift as follows:

$$\begin{aligned} \mathbb{E}\|\Theta(t+1) - \Theta^*\|_2^2 &\leq \mathbb{E}\|\Theta(t) - \Theta^*\|_2^2 - 2\eta(1-\gamma)\mathbb{E}\|\mathcal{V} - f_{\Theta(t)}\|_\mu^2 + \eta^2\mathbb{E}[\|g_t\|_2^2\chi_t] + 4\eta\rho\mathbb{E}[\|g_t\|_2\chi_t] \\ &\quad + 4\eta^2(1+2\rho)^2 \left( 1 + 6\tau u^{\frac{1}{1+p}} \right). \end{aligned}$$

475 The proof follows from identical steps as Theorem 1.  $\square$

476 *Proof of Theorem 3.* The main idea in the proof is to establish a centering argument for both the bias  
477 (due to using clipped stochastic gradients) and the variability (controlled by  $b_t$ ), and to use martingale  
478 concentration arguments based on Freedman's inequality and Azuma-Hoeffding inequality to bound  
479 the sample mean for the bias and variability, respectively. This strategy extends the approach in [6]  
480 for robust mean estimation to reinforcement learning, which has a dynamic behavior unlike the mean  
481 estimation problem. Namely, for any  $t \in \{1, 2, \dots, T\}$ , we have:

$$\begin{aligned} \mathcal{L}(\Theta(t+1)) &\leq \mathcal{L}(\Theta(t)) - 2\eta(1-\gamma)\|f_{\Theta(t)} - \mathcal{V}\|_\mu^2 \\ &\quad + \eta^2\mathbb{E}[\|g_t(\Theta(t))\|_2^2 \mathbb{1}\{\|g_t(\Theta(t))\|_2 \leq b_t\} | \mathcal{F}_t] \\ &\quad + 2\eta B(t) + \eta^2 V(t), \end{aligned}$$

482 where the first line follows from Lemma 2, and

$$B(t) = -\mathbb{E}[g_t(\Theta(t))^\top (\Theta(t) - \Theta^*) | \mathcal{F}_t] + g_t(\Theta(t))^\top (\Theta(t) - \Theta^*) \mathbb{1}\{\|g_t(\Theta(t))\|_2 \leq b_t\}, \quad (31)$$

483 is the bias term, and

$$Z(t) = \|g_t(\Theta(t))\|_2^2 \mathbb{1}\{\|g_t(\Theta(t))\|_2 \leq b_t\} - \mathbb{E}[\|g_t(\Theta(t))\|_2^2 \mathbb{1}\{\|g_t(\Theta(t))\|_2 \leq b_t\} | \mathcal{F}_t]$$

484 is the variability. By telescoping sum over  $t = 1, 2, \dots, T$  and some algebraic manipulations, we  
485 have:

$$\begin{aligned} \frac{\mathcal{L}(\Theta(T+1))}{T} - \frac{\mathcal{L}(\Theta(1))}{T} &\leq -2\eta \left( \frac{1}{T} \sum_{t=1}^T f(\Theta(t)) - f(\Theta^*) \right) \\ &\quad + \eta^2 \frac{u}{T} \sum_{t=1}^T b_t^{1-p} + \frac{2\eta}{T} \sum_{t=1}^T B(t) + \frac{\eta^2}{T} \sum_{t=1}^T Z(t), \end{aligned} \quad (32)$$

486 where we used (20) in the second line. In the following, we will bound the empirical processes  
487  $\frac{1}{T} \sum_{t=1}^T Z(t)$  and  $\frac{1}{T} \sum_{t=1}^T B(t)$ .

Note that  $\{Z(t) : t \in \mathbb{N}\}$  is a martingale difference sequence (MDS) adapted to the filtration  $\{\mathcal{F}_t : t \in \mathbb{N}\}$ . Furthermore, note that

$$|Z(t)| \leq 2b_t^2 \leq 2b_T^2,$$

488 almost surely for any  $t \leq T$ . Thus,  $\sum_{t=1}^n V(t) \mathbb{1}\{n \leq T\}$  forms a martingale with bounded  
 489 differences, and by using Azuma-Hoeffding inequality [53], we have:

$$\frac{1}{T} \sum_{t=1}^T Z(t) \leq b_T \sqrt{\frac{L_\delta}{T}} = \frac{u^{\frac{1}{1+p}} T^{\frac{1-p}{2(1+p)}}}{L_\delta^{\frac{1-p}{2(1+p)}}} \leq \frac{u^{\frac{2}{1+p}} T^{\frac{1-p}{1+p}}}{L_\delta^{\frac{1-p}{1+p}}}, \quad (33)$$

490 with probability at least  $1 - \delta/2$  where the last inequality holds since  $T > L_\delta u^{-\frac{2}{1-p}}$ .

491 We decompose  $B(t)$  into predictable and non-predictable components as follows:

$$B(t) = \mathbb{E}[g_t(\Theta(t))^\top (\Theta(t) - \Theta^*) \mathbb{1}\{\|g_t(\Theta(t))\|_2 > b_t\} | \mathcal{F}_t] + B_0(t), \quad (34)$$

492 where the martingale difference sequence  $B_0(t)$  is defined as follows:

$$B_0(t) = -\mathbb{E}[g_t(\Theta(t))^\top (\Theta(t) - \Theta^*) \mathbb{1}\{\|g_t(\Theta(t))\|_2 \leq b_t\} | \mathcal{F}_t] \\ + g_t(\Theta(t))^\top (\Theta(t) - \Theta^*) \mathbb{1}\{\|g_t(\Theta(t))\|_2 \leq b_t\}. \quad (35)$$

493 By (25) (with  $b_t$  replaced by  $b_t$ ), the first term on the RHS of (34) is bounded by  $2\rho u c_{t,\delta}^{-p}$ . Thus, we  
 494 have:

$$\frac{1}{T} \sum_{t=1}^T B(t) \leq \frac{2\rho u^{\frac{1}{1+p}} L_\delta^{\frac{p}{1+p}}}{T^{\frac{p}{1+p}}} + \frac{1}{T} \sum_{t=1}^T B_0(t). \quad (36)$$

495 In order to upper bound  $\frac{1}{T} \sum_{t=1}^T B_0(t)$ , we use Freedman's inequality for martingales [11]. To use  
 496 Freedman's inequality, we verify the following conditions.

497 1. For any  $t \leq T$ , we have:

$$|g_t(\Theta(t))^\top (\Theta(t) - \Theta^*) \mathbb{1}\{\|g_t(\Theta(t))\|_2 \leq b_t\}| \leq 2\rho b_t \leq 2\rho b_t,$$

498 almost surely.

499 2. The normalized quadratic variation process satisfies:

$$\frac{1}{T} \sum_{t=1}^T |B_0(t)|^2 \\ \leq \frac{1}{T} \sum_{t=1}^T \mathbb{E}[|g_t(\Theta(t))^\top (\Theta(t) - \Theta^*)|^2 \mathbb{1}\{\|g_t(\Theta(t))\|_2 \leq b_t\} | \mathcal{F}_t], \\ \leq \frac{4\rho^2}{T} \sum_{t=1}^T \mathbb{E}[\|g_t(\Theta(t))\|_2^2 \mathbb{1}\{\|g_t(\Theta(t))\|_2 \leq b_t\} | \mathcal{F}_t], \\ \leq \frac{4\rho^2}{T} \sum_{t=1}^T u b_t^{1-p} \leq 4\rho^2 \frac{u^{\frac{2}{1+p}} T^{\frac{1-p}{1+p}}}{L_\delta^{\frac{1-p}{1+p}}},$$

500 where the first inequality is due to  $Var(Z) \leq \mathbb{E}[Z^2]$  for any random variable  $Z$  with a  
 501 finite variance, the second inequality follows from Cauchy-Schwarz inequality and triangle  
 502 inequality with  $\max\{\|\Theta(t)\|_2, \|\Theta^*\|_2\} \leq \rho$  due to projection, the third inequality follows  
 503 from (20) with  $b_t$  replaced by  $b_t$ .

504 Thus, by Freedman's inequality, we have:

$$\frac{1}{T} \sum_{t=1}^T B_0(t) \leq \frac{2\sqrt{2}\rho u^{\frac{1}{1+p}} L_\delta^{\frac{p}{1+p}}}{T^{\frac{p}{1+p}}} + \frac{4\rho L_\delta b_t}{3T}, \\ \leq (2\sqrt{2} + 4/3)\rho \frac{u^{\frac{1}{1+p}} L_\delta^{\frac{p}{1+p}}}{T^{\frac{p}{1+p}}},$$



505 with probability at least  $1 - \delta/2$ . Therefore, from (36) and the above inequality, with probability at  
 506 least  $1 - \delta/2$ , we have:

$$\frac{1}{T} \sum_{t=1}^T B(t) \leq \frac{7\rho u^{\frac{1}{1+p}} L_{\delta}^{\frac{p}{1+p}}}{T^{\frac{p}{1+p}}} \quad (37)$$

507 Hence, by substituting (33) and (37) into (32) with union bound, and using the specified step-size  
 508 together with the facts that  $\mathcal{L}(\Theta(1)) \leq 4\rho^2$  and  $\mathcal{L}(\Theta(T+1)) \geq 0$ , we conclude the proof.  $\square$

## 509 B Proofs for Robust Natural Actor-Critic

510 *Proof of Theorem 4.* We use the following Lyapunov function for the analysis [1, 55, 33]:

$$\mathcal{L}(\pi) = \sum_{s \in \mathbb{S}} d_{\lambda}^{\pi^*}(s) \sum_{a \in \mathbb{A}} \pi^*(a|s) \log \frac{\pi^*(a|s)}{\pi(a|s)}. \quad (38)$$

511 For the Lyapunov drift, at any iteration  $k$ , we have:

$$\mathcal{L}(\pi_{k+1}) - \mathcal{L}(\pi_k) = \sum_{s,a} d_{\lambda}^{\pi^*}(s) \pi^*(a|s) \log \frac{\pi_k(a|s)}{\pi_{k+1}(a|s)}. \quad (39)$$

512 Since  $\sup_{s,a} \|\Phi(s,a)\|_2 \leq 1$ ,  $\nabla_W \log \pi_W(a|s)$  is 1-Lipschitz continuous [1]. Thus, we have:

$$|\log \pi_{k+1}(a|s) - \log \pi_k(a|s) - \nabla^{\top} \log \pi_k(a|s) (W(k+1) - W(k))| \leq \frac{1}{2} \|W(k+1) - W(k)\|_2^2. \quad (40)$$

513 Since  $W(k+1) = W(k) + \alpha \bar{\Theta}_k(T)$ , we have:

$$\mathcal{L}(\pi_{k+1}) - \mathcal{L}(\pi_k) \leq \frac{\eta^2}{2} \|\bar{\Theta}_k(T)\|_2^2 - \eta \cdot \sum_{s,a} d_{\lambda}^{\pi^*}(s) \pi^*(a|s) \nabla^{\top} \log \pi_k(a|s) \bar{\Theta}_k(T). \quad (41)$$

514 By performance difference lemma [25], we have:

$$\mathcal{V}^{\pi}(s) - \mathcal{V}^{\pi'}(s) = \frac{1}{1-\gamma} \mathbb{E}_{\substack{s \sim d_{\lambda}^{\pi} \\ a \sim \pi(\cdot|s)}} [\mathcal{A}^{\pi'}(s,a)]. \quad (42)$$

515 Using the last two inequalities, we have the drift inequality:

$$\begin{aligned} \mathcal{L}(\pi_{k+1}) - \mathcal{L}(\pi_k) &\leq \frac{\eta^2}{2} \|\bar{\Theta}_k(T)\|_2^2 - \eta \sum_{s,a} d_{\lambda}^{\pi^*}(s) \pi^*(a|s) \left( \nabla^{\top} \log \pi_k(a|s) \bar{\Theta}_k(T) - \mathcal{A}^{\pi_k}(s,a) \right) \\ &\quad - \eta \left( \mathcal{V}^{\pi^*}(\lambda) - \mathcal{V}^{\pi_k}(\lambda) \right). \end{aligned}$$

For the log-linear policy parameterization, we have

$$\nabla \log \pi_W(a|s) = \Phi(s,a) - \sum_{a' \in \mathbb{A}} \pi_W(a'|s) \Phi(s,a').$$

516 Also, from the definition of  $\mathcal{A}^{\pi}(s,a) = \mathcal{Q}^{\pi}(s,a) - \sum_{a' \in \mathbb{A}} \pi(a'|s) \mathcal{Q}^{\pi}(s,a')$ ,

$$\begin{aligned} \mathbb{E} \left[ \left( \nabla^{\top} \log \pi_k(a|s) \bar{\Theta}_k(T) - \mathcal{A}^{\pi_k}(s,a) \right)^2 \right] &\leq \mathbb{E} \left[ \left( \langle \Phi(s,a), \bar{\Theta}_k(T) \rangle - \mathcal{Q}^{\pi_k}(s,a) \right)^2 \right], \\ &= \sum_{s,a} d_{\lambda}^{\pi^*}(s) \pi^*(a|s) \left( \langle \Phi(s,a), \bar{\Theta}_k(T) \rangle - \mathcal{Q}^{\pi_k}(s,a) \right)^2, \\ &\leq C_{\text{conc}} \sum_{s,a} \mu^{\pi_k}(s,a) \left( \langle \Phi(s,a), \bar{\Theta}_k(T) \rangle - \mathcal{Q}^{\pi_k}(s,a) \right)^2, \end{aligned}$$

517 where the first line follows from the fact that  $\text{Var}(X) \leq \mathbb{E}[X^2]$  for any random variable  $X$  with  
 518 finite second-order moments, and the last line follows from a change of measure argument. Then, by  
 519 Theorem 3, we have:

$$\sum_{s,a} \mu^{\pi_k}(s,a) \left( \langle \Phi(s,a), \bar{\Theta}_k(T) \rangle - \mathcal{Q}^{\pi_k}(s,a) \right)^2 \leq \frac{\rho u_k^{\frac{1}{1+p}}}{(1-\gamma) T^{\frac{p}{1+p}}} \left( 3L_{\delta}^{-\frac{1-p}{2(1+p)}} + 7L_{\delta}^{\frac{p}{1+p}} \right),$$

520 with probability at least  $1 - \delta/K$ . Furthermore, we have:

$$\|\bar{\Theta}_k(T)\|_2^2 \leq \rho^2,$$

521 for any  $k, T$  by the projection. As such, we can bound the drift inequality as follows:

$$\begin{aligned} \mathcal{L}(\pi_{k+1}) - \mathcal{L}(\pi_k) \leq \frac{\eta^2}{2} \rho^2 + \sqrt{C_{\text{conc}} \frac{\rho u_k^{\frac{1}{1+p}}}{(1-\gamma) T^{\frac{p}{1+p}}} \left( 3L_\delta^{-\frac{1-p}{2(1+p)}} + 7L_\delta^{\frac{p}{1+p}} \right)} \\ - \eta \left( \mathcal{V}^{\pi^*}(\lambda) - \mathcal{V}^{\pi_k}(\lambda) \right), \quad (43) \end{aligned}$$

522 with probability at least  $1 - \delta/K$ . By telescoping sum of the above inequality, using union bound, and  
 523 noting that  $\pi_0(a|s) = \frac{1}{|\mathbb{A}|}$  for any  $s, a$ , which leads to  $\mathcal{L}(\pi_1) = \log |\mathbb{A}|$ , we conclude the proof.  $\square$
